# Supplementary material for: A non-invasive clinical application of wave intensity analysis based on ultrahigh temporal resolution phase-contrast cardiovascular magnetic resonance
Source: PubMed Central journal article supplement (PMC3472227; doi:10.1186/1532-429x-14-57), 2012-08-09
Supplement: 1532-429X-14-57-S1.pdf [file 1532-429X-14-57-S1.pdf]

## Appendix 1 – Area and velocity formulation of wave intensity

In this study we propose that it is useful to express wave intensity in terms of A and U when working with MR measurements and thus the relevant derivations from first principles follow.

In 1-D analysis, U, A and P are taken as functions only of axial length (x) and time (t). Defining U as mean velocity over a cross-section and hence UA as the flow rate, the equations of conservation of mass and conservation of momentum are:

$$\frac{\partial A}{\partial t} + \frac{\partial(UA)}{\partial x} = 0 \quad (1)$$

$$\frac{\partial U}{\partial t} + U \frac{\partial U}{\partial x} = -\frac{1}{\rho} \frac{\partial P}{\partial x} - FU \quad (2)$$

where  $\rho$  is the fluid density and F is the resistance arising from the viscosity of the flowing medium. A tube law relating the area of the vessel and the pressure is then assumed:

$$A = A(P) \quad (3)$$

and the gradient of P can be expressed in terms of A:

$$\frac{dP}{dx} = \frac{\left(\frac{dA}{dx}\right)}{\left(\frac{dA}{dP}\right)} \quad (4)$$

The resulting conservation equations in matrix form are:

$$\begin{pmatrix} A \\ U \end{pmatrix}_t + \begin{pmatrix} U & A \\ \rho \frac{dA}{dP} & U \end{pmatrix} \begin{pmatrix} A \\ U \end{pmatrix}_x = \begin{pmatrix} 0 \\ FU \end{pmatrix} \quad (5)$$

Where we use subscript notation for partial derivatives. The eigenvalues of the matrix multiplying the x-derivatives, according to the method of characteristics, are:

$$\lambda_{\pm} = U \pm c \quad (6)$$

where we have defined the wave speed, c:

$$c(x,t) = \sqrt{\frac{A}{\rho \frac{dA}{dP}}} = \sqrt{\frac{1}{\rho D}} \quad (7)$$

where D is vessel distensibility, as firstly derived by Bramwell and Hill.

Following the method of characteristics, along the characteristic directions  $dx/dt = U \pm c$ , the conservation equations (1 and 2) become:

$$\frac{dA}{dt} - (U \pm c) \frac{\partial A}{\partial x} + U \frac{\partial A}{\partial x} + A \frac{\partial U}{\partial x} = 0 \quad (8)$$

$$\frac{dU}{dt} - (U \pm c) \frac{\partial U}{\partial x} + \frac{c^2}{A} \frac{\partial A}{\partial x} + U \frac{\partial U}{\partial x} = -FU \quad (9)$$

By multiplying equation (8) by a factor of  $\left(\pm \frac{c}{A}\right)$  and then substituting it into equation (9) for  $\frac{\partial A}{\partial x}$ , it results

that:

$$\frac{dU}{dt} \pm c \frac{d \ln A}{dt} = -FU \quad (10)$$

given  $dA/A = d \ln A$ . Note that + is valid along the forward characteristic ( $dx/dt = U + c$ ) and – along the backward characteristic ( $dx/dt = U - c$ ).

The changes in velocity ( $dU$ ) and the fractional changes in area ( $d \ln A$ ) are related by the waterhammer equation:

$$dU_{\pm} = \pm cd \ln A_{\pm} \quad (11)$$

Assuming that the forward and backward waves are additive, the measured  $dU$  and  $d \ln A$  can be separated into their forward (+) and backward (–) components by using the waterhammer equations:

$$dU_{\pm} = \frac{1}{2}(dU \pm cd \ln A) \quad (12)$$

$$d \ln A_{\pm} = \frac{1}{2} \left( d \ln A \pm \frac{1}{c} dU \right) \quad (13)$$

Finally, wave intensity can be defined in terms of area ( $dI_A$ ), as:

$$dI_A = dU d \ln A \quad (14)$$

It can be shown that the net wave intensity can be divided into the forward and backward intensities:

$$dI_A = dI_{A(+)} + dI_{A(-)} \quad (15)$$

with the separated  $dI_A$  expressed as:

$$dI_{A(\pm)} = \pm \frac{c}{4} \left( d \ln A \pm \frac{1}{c} dU \right)^2 \quad (16)$$
